# Supplementary material for: PACAP Enhances Axon Outgrowth in Cultured Hippocampal Neurons to a Comparable Extent as BDNF
Source: PubMed Central journal article supplement (PMC4373823; doi:10.1371/journal.pone.0120526), 2015-03-25

Figure S1. High magnification images of a primary hippocampal neuron

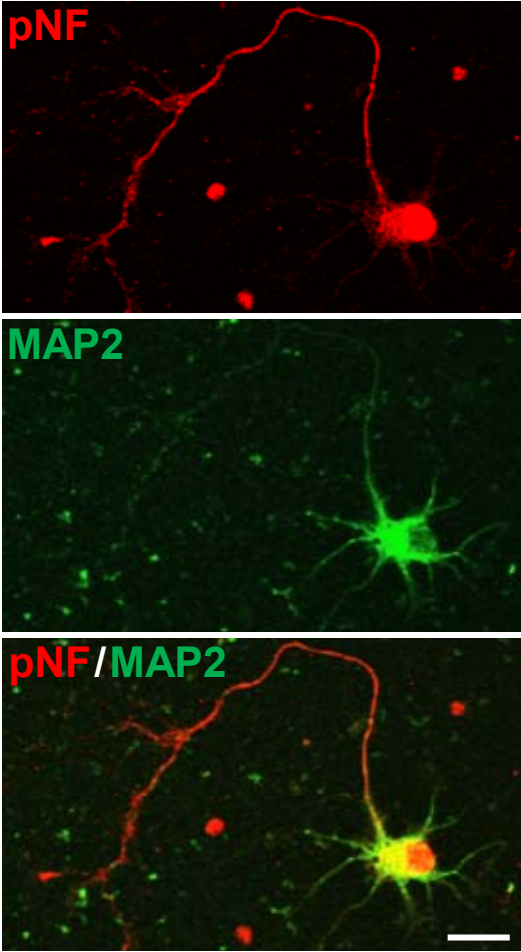

Supplement: pone.0120526.s001.pdf [file pone.0120526.s001.pdf]
